# Supplementary material for: Adjusting Heterodimeric Coiled-Coils (K/E Zipper) to Connect Autophagy-Inducing Peptide with Cell-Penetrating Peptide
Source: MDPI journal article supplement (doi:10.3390/pharmaceutics15041048), 2023-03-24
Supplement: s1 [file s1]

# Adjusting heterodimeric coiled-coils (K/E zipper) to connect autophagy-inducing peptide with cell-penetrating peptide

Yoshiyuki Hakata <sup>1,2,†</sup>, Kazuma Yamashita <sup>3,†</sup>, Sonoko Hashimoto <sup>3</sup>, Takashi Ohtsuki <sup>4</sup>, Masaaki Miyazawa <sup>1</sup> and Mizuki Kitamatsu <sup>3,\*</sup>

<sup>1</sup> Department of Immunology, Faculty of Medicine, Kindai University, 377-2 Ohno-Higashi, Osaka-Sayama, Osaka 589-8511, Japan

<sup>2</sup> Department of Arts and Sciences, Faculty of Medicine, Kindai University, 377-2 Ohno-Higashi, Osaka-Sayama, Osaka 589-8511, Japan

<sup>3</sup> Department of Applied Chemistry, Faculty of Science and Engineering, Kindai University, 3-4-1 Kowakae, Higashi-Osaka, Osaka 577-8502, Japan

<sup>4</sup> Department of Interdisciplinary Science and Engineering in Health Systems, Okayama University, 3-1-1 Tsu-shimanaka, Kita-ku, Okayama 700-8530, Japan

\* Correspondence: kitamatsu@apch.kindai.ac.jp

† These authors contributed equally.

**Table S1.** Synthesized peptides used in this study: Nomenclature and structure<sup>a</sup>

| Peptide       | Sequence                               | Exact mass |          | Purity (%) |
|---------------|----------------------------------------|------------|----------|------------|
|               |                                        | Calculated | Observed |            |
| <b>AIP-K1</b> | Tmr-VWNATFHIWHD- KIAALKE               | 2591.30    | 2591.27  | 98         |
| <b>AIP-K2</b> | Tmr-VWNATFHIWHD-(KIAALKE) <sub>2</sub> | 3344.78    | 3343.72  | 98         |
| <b>AIP-K3</b> | Tmr-VWNATFHIWHD-(KIAALKE) <sub>3</sub> | 4098.25    | 4099.07  | 98         |
| <b>AIP-K4</b> | Tmr-VWNATFHIWHD-(KIAALKE) <sub>4</sub> | 4851.73    | 4850.63  | 98         |
| <b>E1-CPP</b> | Fam- EIAALEK -RRRRRRRR                 | 2379.31    | 2379.31  | 98         |
| <b>E2-CPP</b> | Fam-(EIAALEK) <sub>2</sub> -RRRRRRRR   | 3133.73    | 3135.42  | 98         |
| <b>E3-CPP</b> | Fam-(EIAALEK) <sub>3</sub> -RRRRRRRR   | 3887.17    | 3889.92  | 98         |
| <b>E4-CPP</b> | Fam-(EIAALEK) <sub>4</sub> -RRRRRRRR   | 4641.59    | 4642.71  | 98         |

<sup>a</sup> The calculated masses and the masses observed by MALDI-TOF mass spectrometry and the purity found by RP-HPLC are listed for each of the peptides.

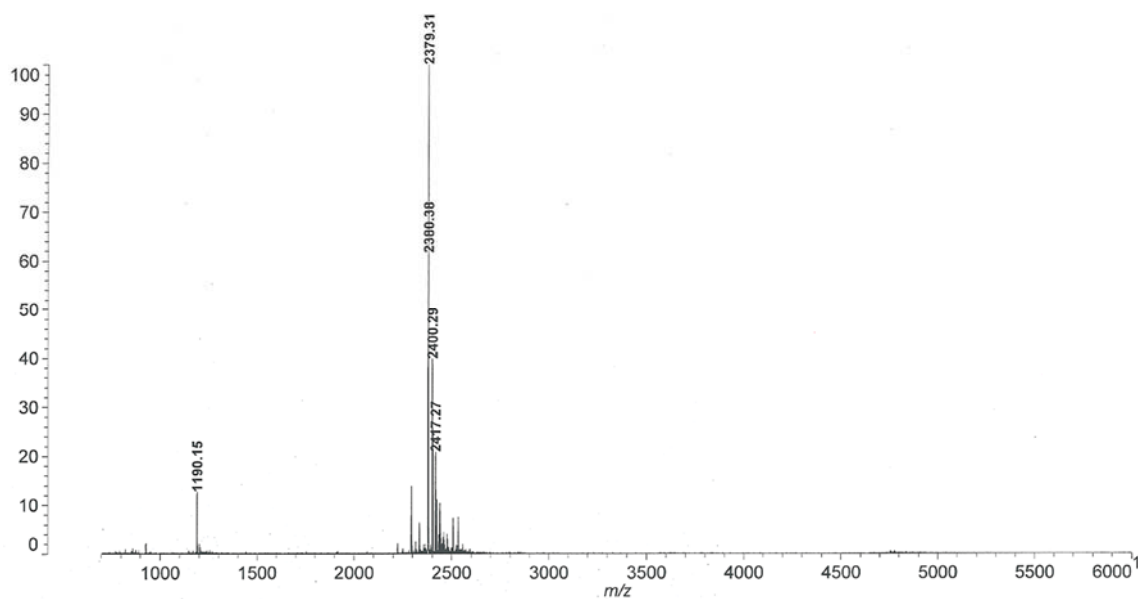

**Figure S1.** MALDI-Tof Mass spectrum of **E1-CPP**. An  $\alpha$ -CHCA was used as a matrix. calcd.  $[M+H]^+ = 2379.31$  and obsd.  $[M+H]^+ = 2379.31$ .

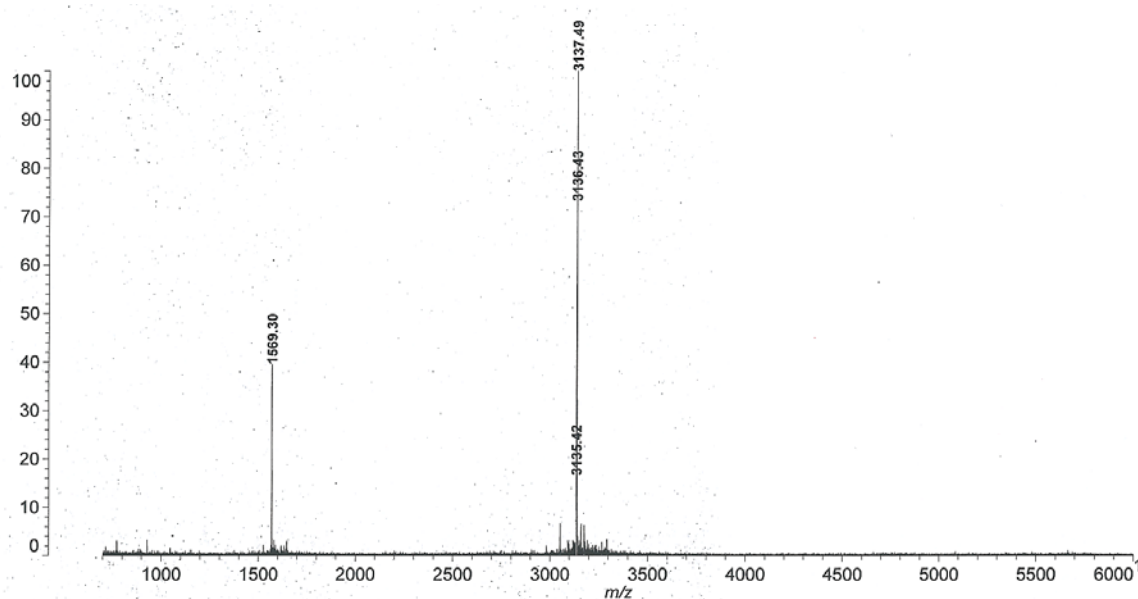

**Figure S2.** MALDI-Tof Mass spectrum of **E2-CPP**. An  $\alpha$ -CHCA was used as a matrix. calcd.  $[M+H]^+ = 3133.73$  and obsd.  $[M+H]^+ = 3135.42$ .

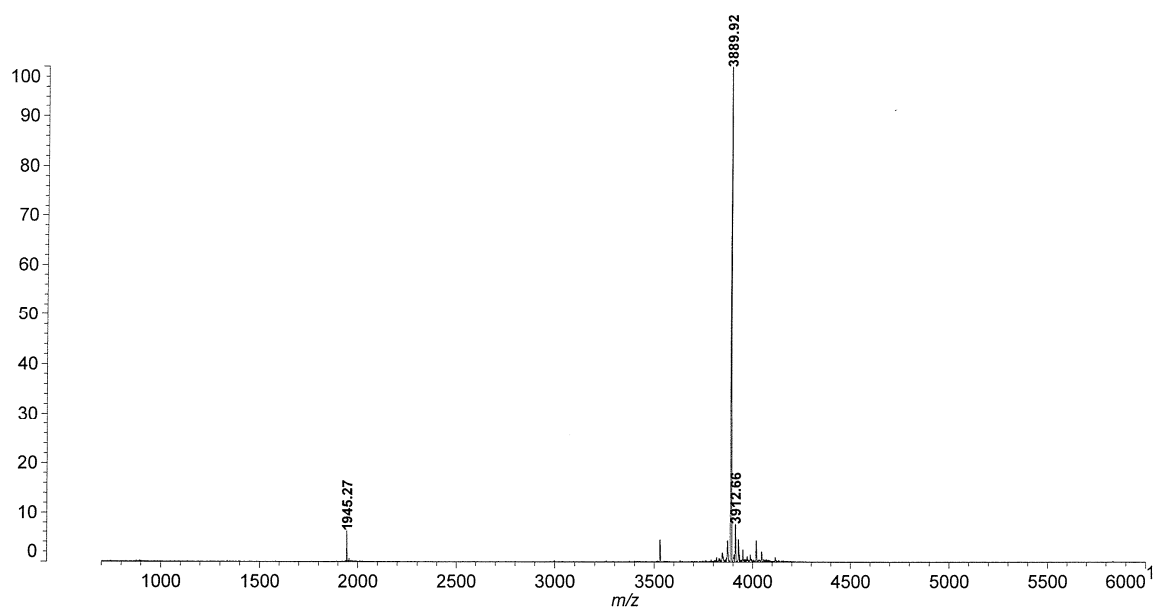

**Figure S3.** MALDI-Tof Mass spectrum of **E3-CPP**. An  $\alpha$ -CHCA was used as a matrix. calcd.  $[M+H]^+ = 3887.17$  and obsd.  $[M+H]^+ = 3889.92$ .

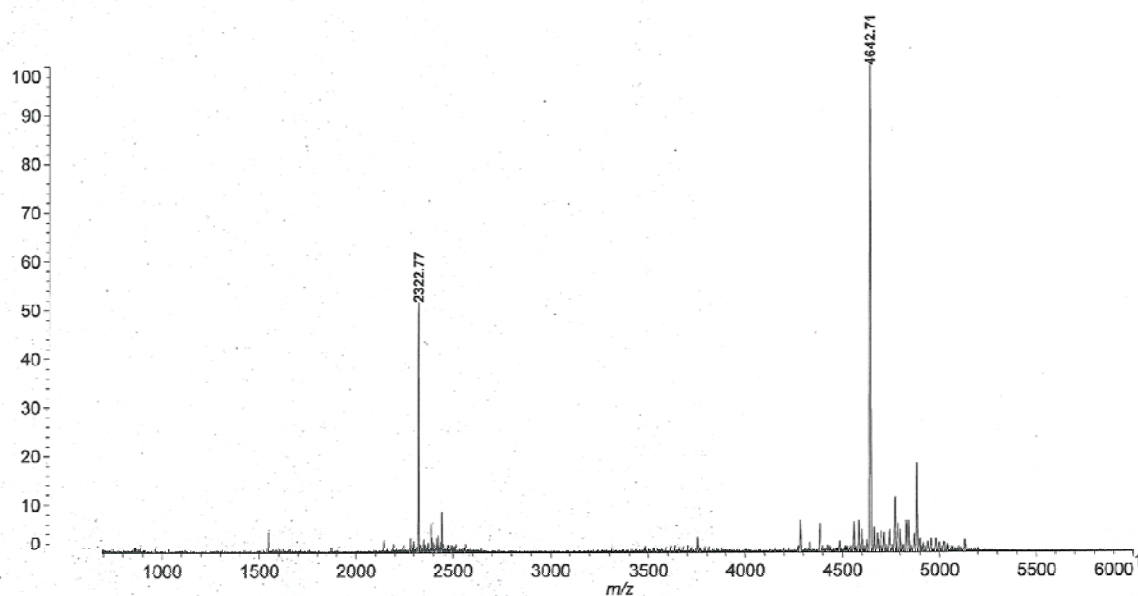

**Figure S4.** MALDI-Tof Mass spectrum of **E4-CPP**. An  $\alpha$ -CHCA was used as a matrix. calcd.  $[M+H]^+ = 4641.59$  and obsd.  $[M+H]^+ = 4642.71$ .

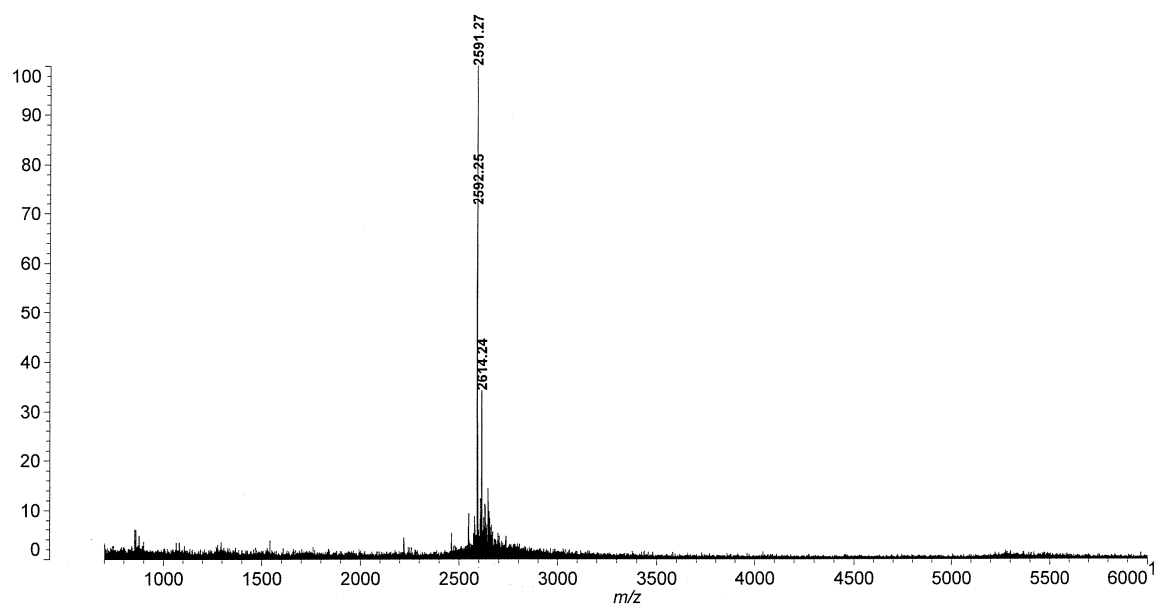

**Figure S5.** MALDI-Tof Mass spectrum of **AIP-K1**. An  $\alpha$ -CHCA was used as a matrix. calcd.  $[M+H]^+ = 2591.30$  and obsd.  $[M+H]^+ = 2591.27$ .

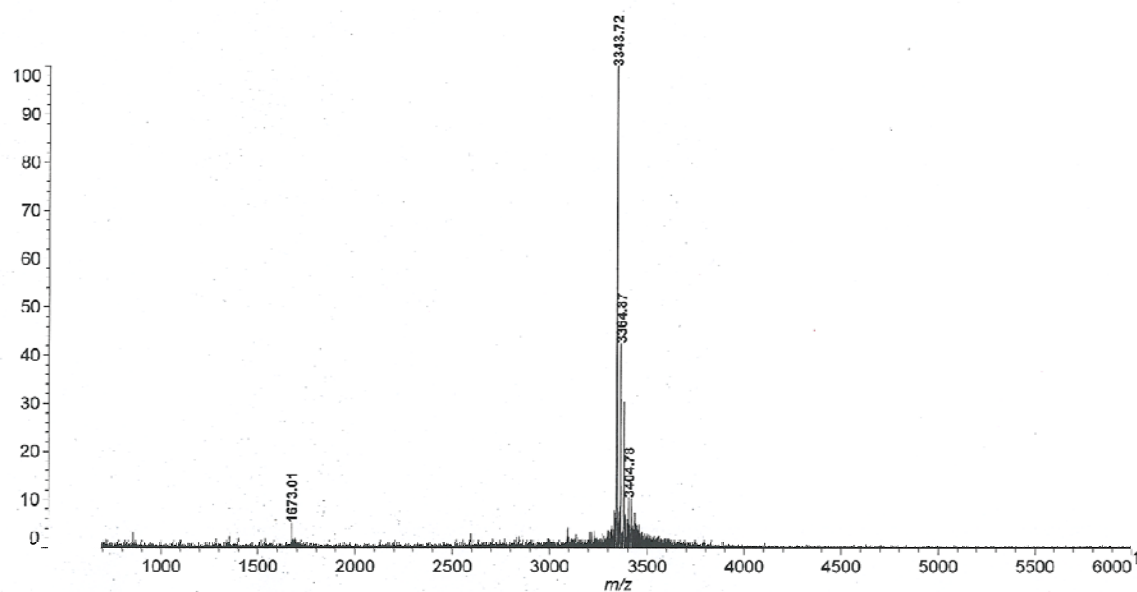

**Figure S6.** MALDI-Tof Mass spectrum of **AIP-K2**. An  $\alpha$ -CHCA was used as a matrix. calcd.  $[M+H]^+ = 3344.78$  and obsd.  $[M+H]^+ = 3343.72$ .

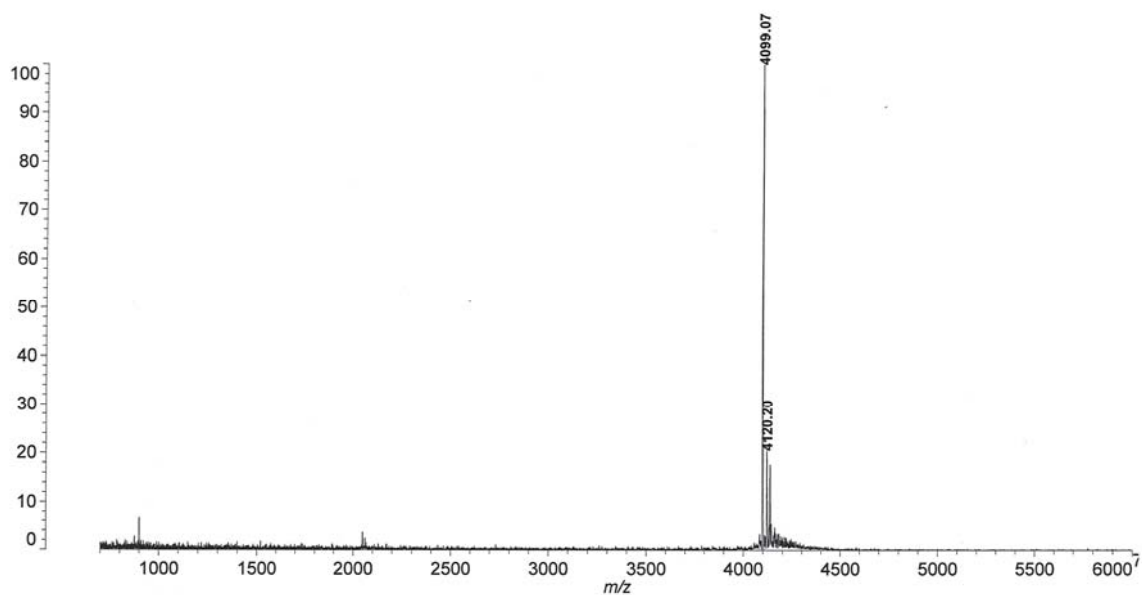

**Figure S7.** MALDI-Tof Mass spectrum of **AIP-K3**. An  $\alpha$ -CHCA was used as a matrix. calcd.  $[M+H]^+ = 4098.25$  and obsd.  $[M+H]^+ = 4099.07$ .

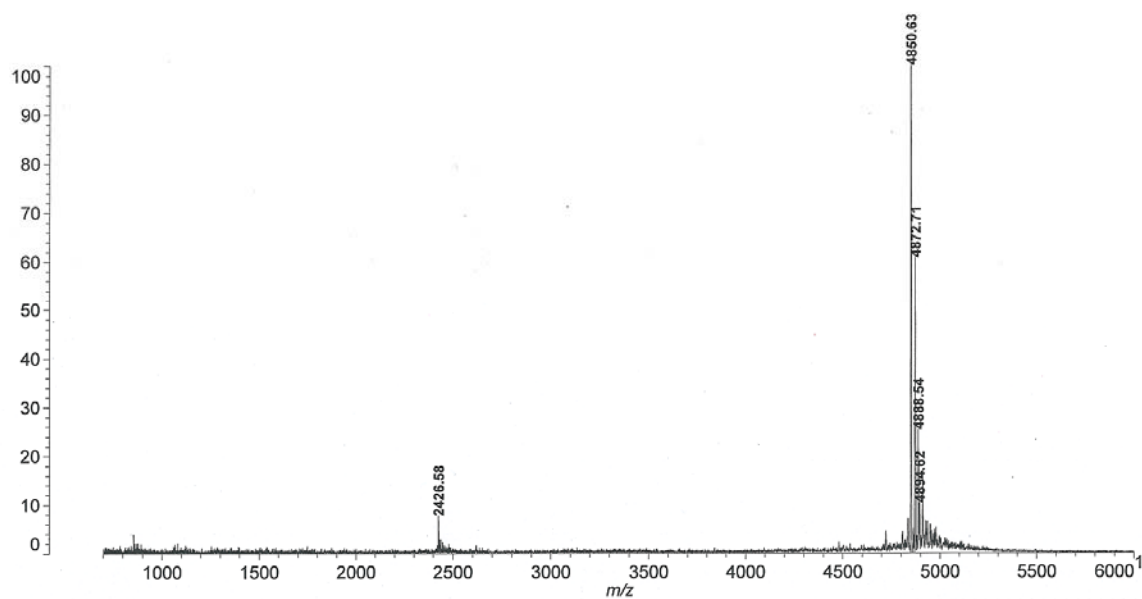

**Figure S8.** MALDI-Tof Mass spectrum of **AIP-K4**. An  $\alpha$ -CHCA was used as a matrix. calcd.  $[M+H]^+ = 4851.73$  and obsd.  $[M+H]^+ = 4850.63$ .

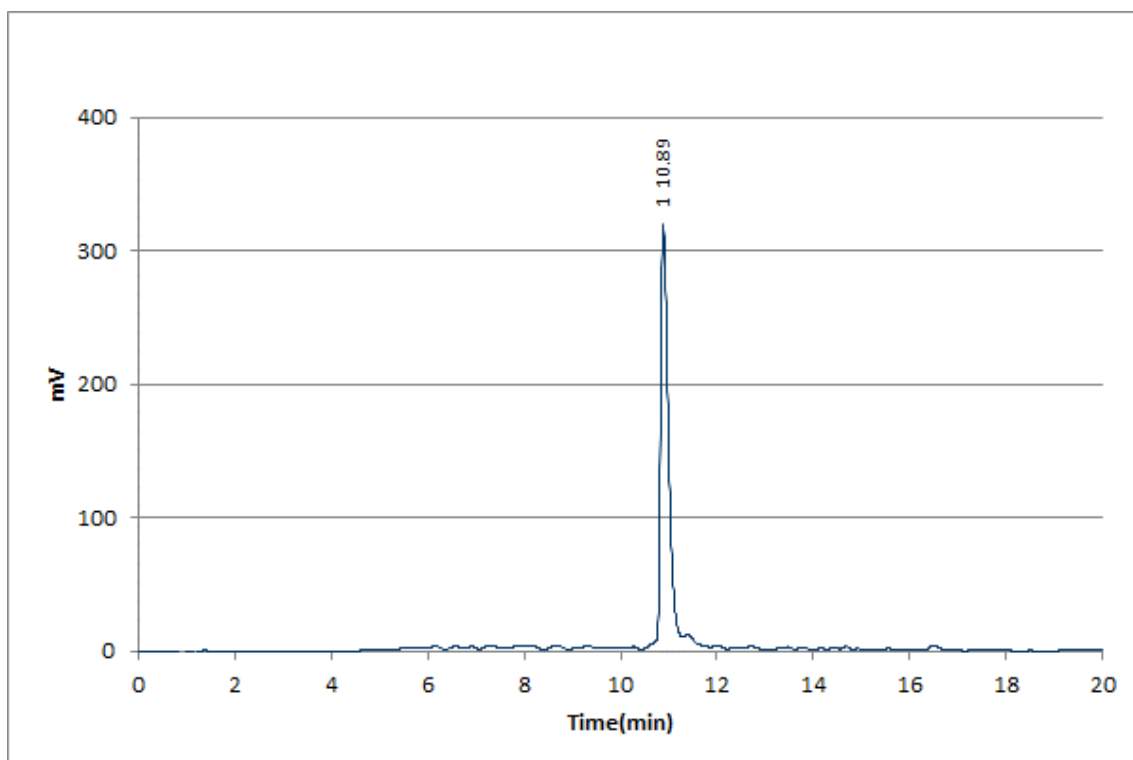

**Figure S9.** RP-HPLC chart of **E1-CPP** on C18 column. Buffer A. 0.1% TFA in water; buffer B, acetonitrile and monitoring at 230 nm with a gradient of 10-80% for 20 min.

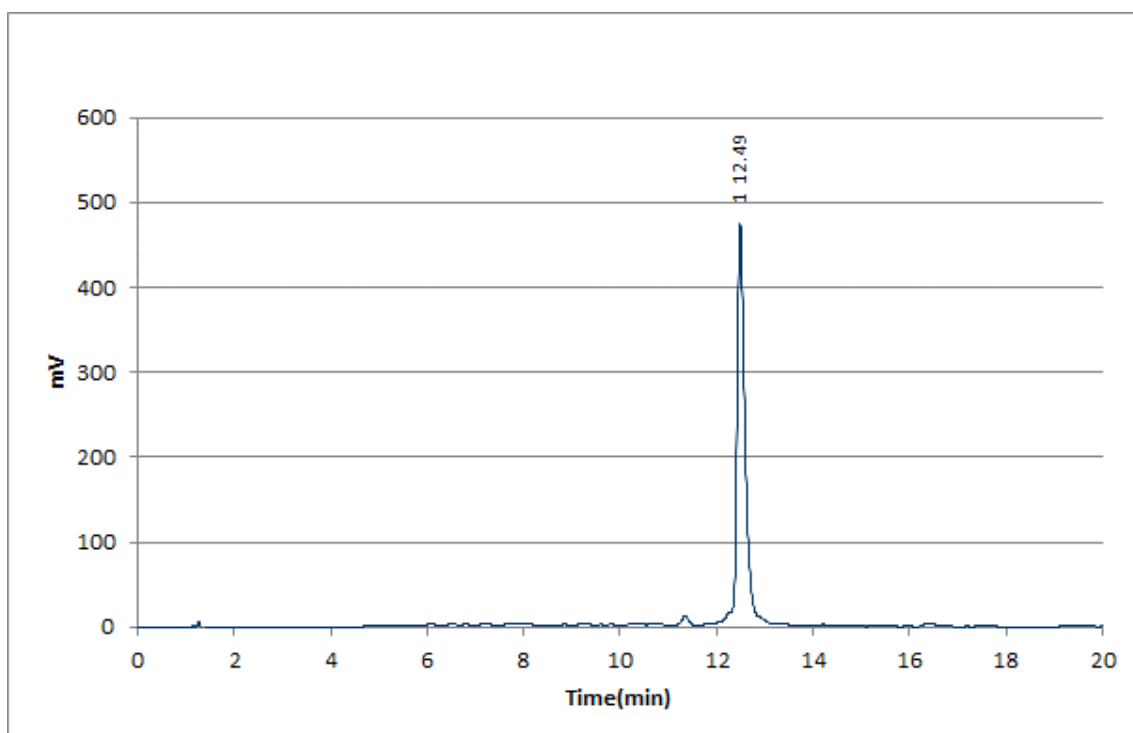

**Figure S10.** RP-HPLC chart of **E2-CPP** on C18 column. Buffer A. 0.1% TFA in water; buffer B, acetonitrile and monitoring at 230 nm with a gradient of 10-80% for 20 min.

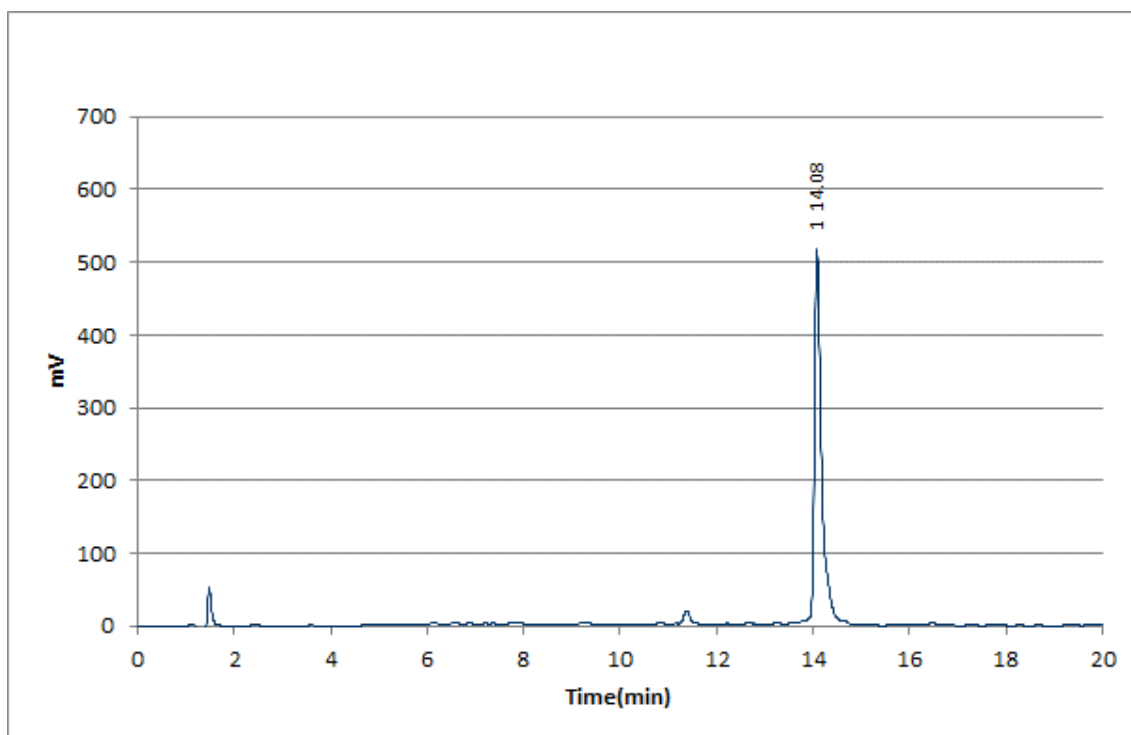

**Figure S11.** RP-HPLC chart of **E3-CPP** on C18 column. Buffer A. 0.1% TFA in water; buffer B, acetonitrile and monitoring at 230 nm with a gradient of 10-80% for 20 min.

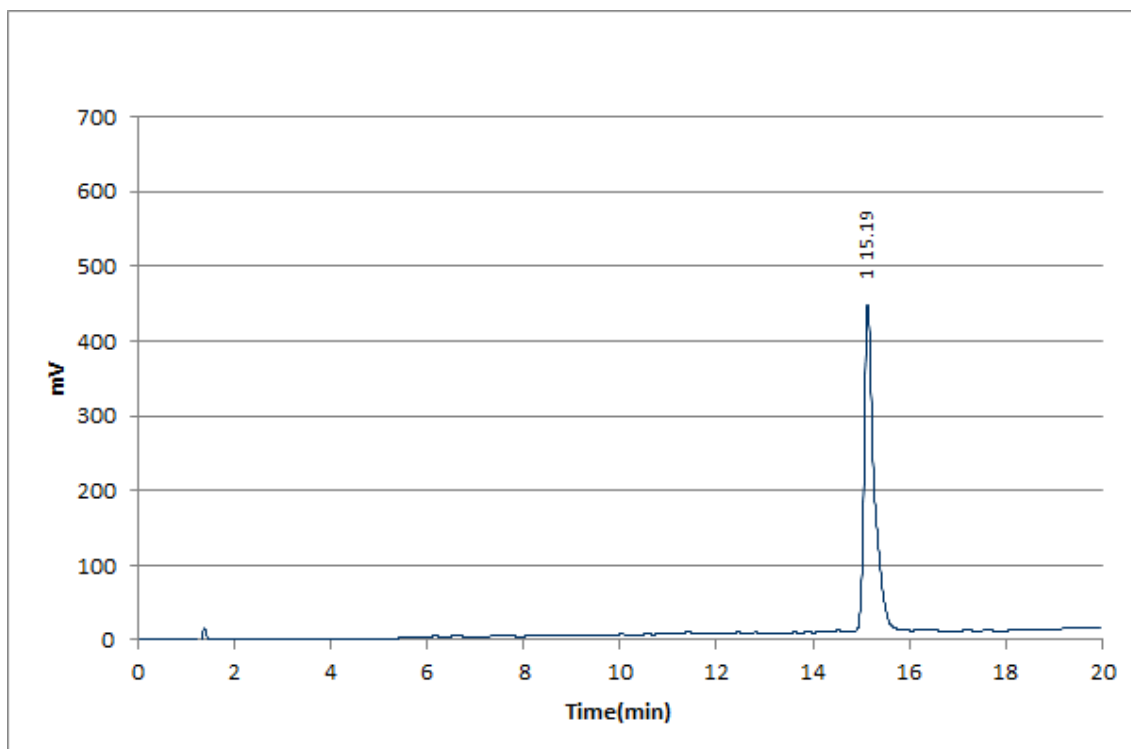

**Figure S12.** RP-HPLC chart of **E4-CPP** on C18 column. Buffer A. 0.1% TFA in water; buffer B, acetonitrile and monitoring at 230 nm with a gradient of 10-80% for 20 min.

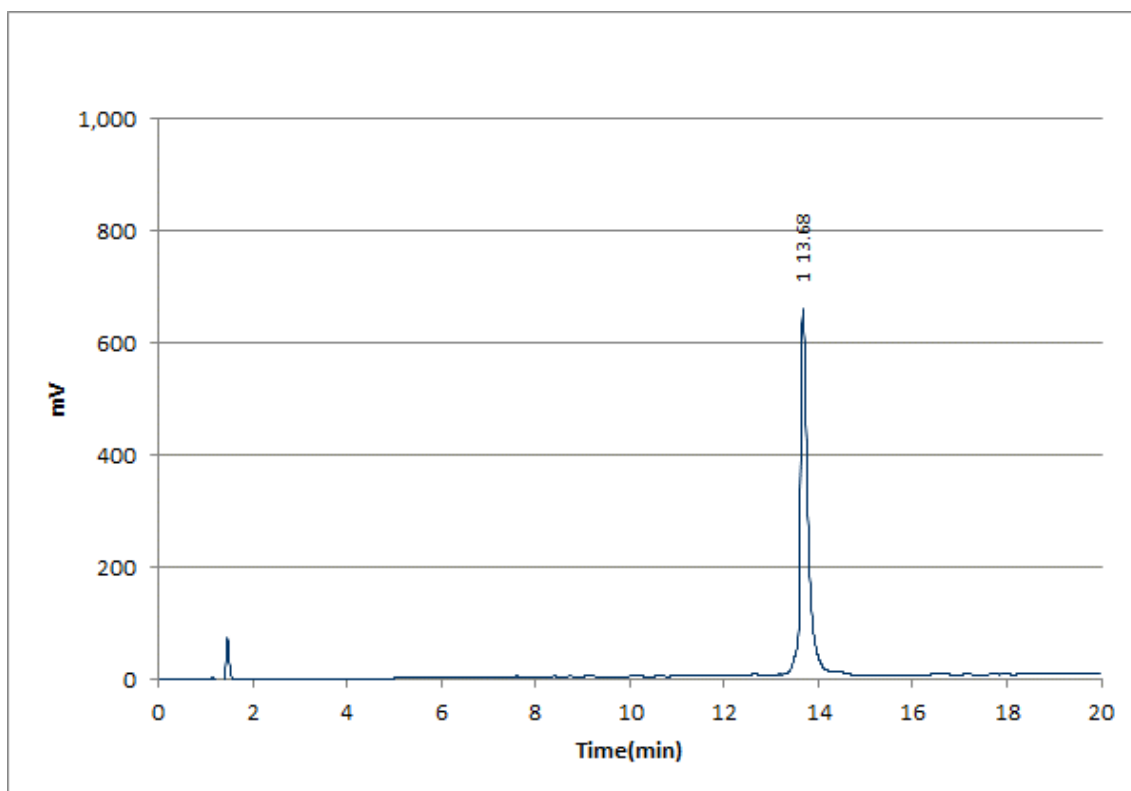

**Figure S13.** RP-HPLC chart of **AIP-K1** on C18 column. Buffer A. 0.1% TFA in water; buffer B, acetonitrile and monitoring at 230 nm with a gradient of 10-80% for 20 min.

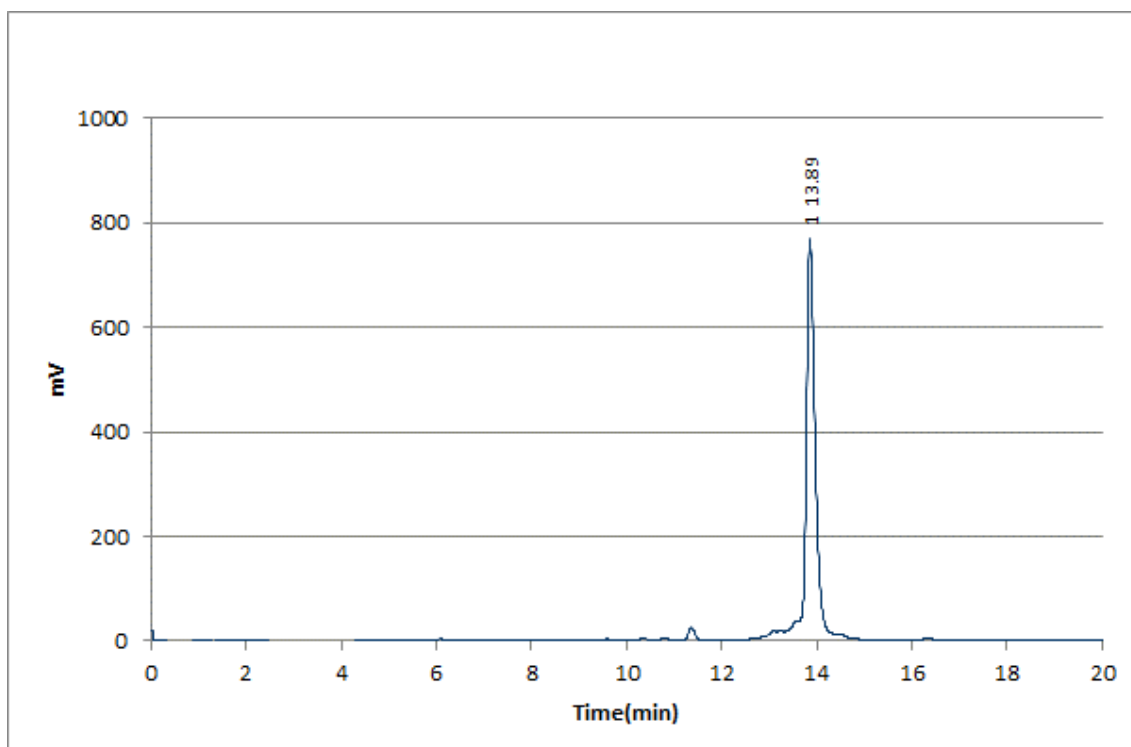

**Figure S14.** RP-HPLC chart of **AIP-K2** on C18 column. Buffer A. 0.1% TFA in water; buffer B, acetonitrile and monitoring at 230 nm with a gradient of 10-80% for 20 min.



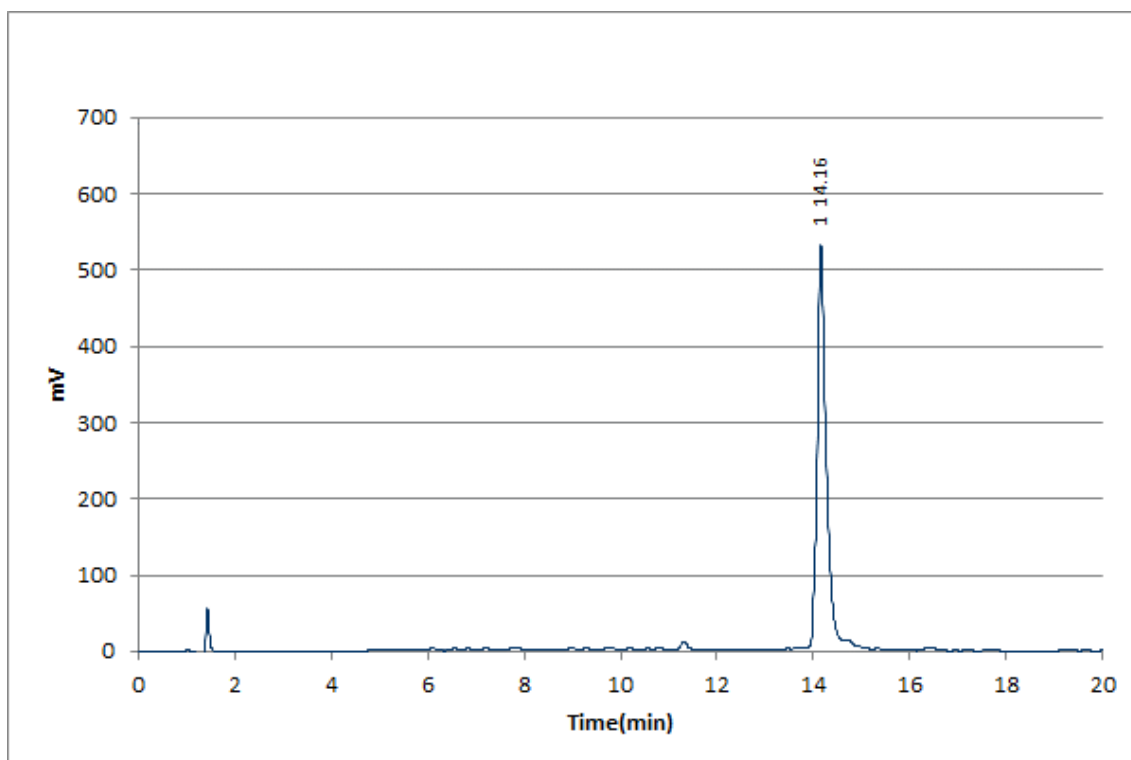

**Figure S15.** RP-HPLC chart of **AIP-K3** on C18 column. Buffer A. 0.1% TFA in water; buffer B, acetonitrile and monitoring at 230 nm with a gradient of 10-80% for 20 min.

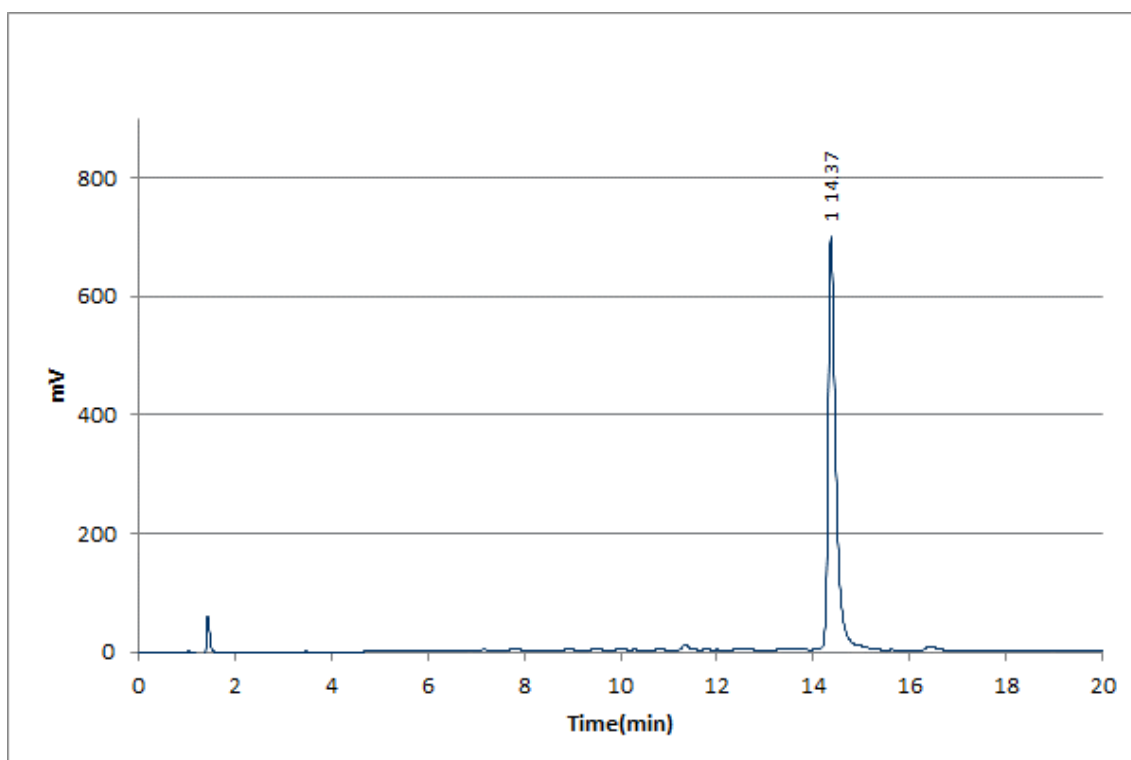

**Figure S16.** RP-HPLC chart of **AIP-K4** on C18 column. Buffer A. 0.1% TFA in water; buffer B, acetonitrile and monitoring at 230 nm with a gradient of 10-80% for 20 min.

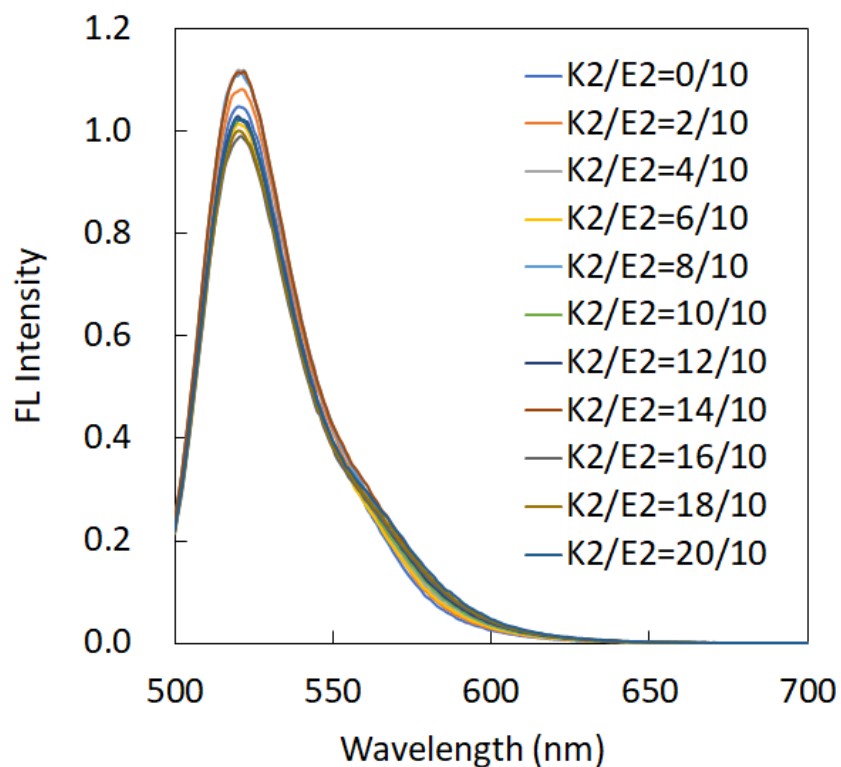

**Figure S17.** Fluorescence spectra of 50 nM **E2-CPP** with various concentrations of **AIP-K2** in aqueous solution.

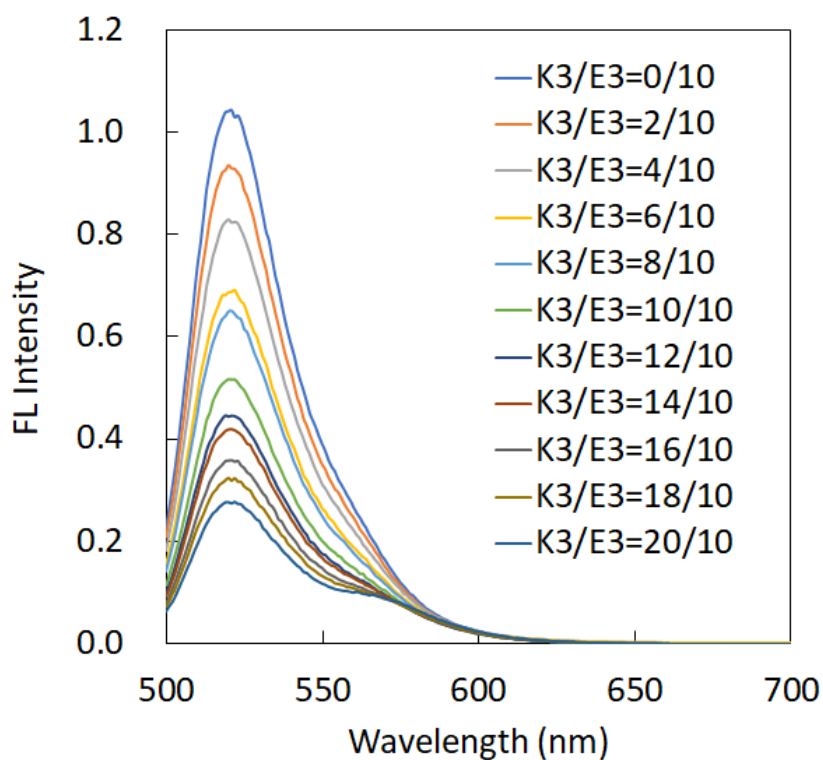

**Figure S18.** Fluorescence spectra of 50 nM **E3-CPP** with various concentrations of **AIP-K3** in aqueous solution.

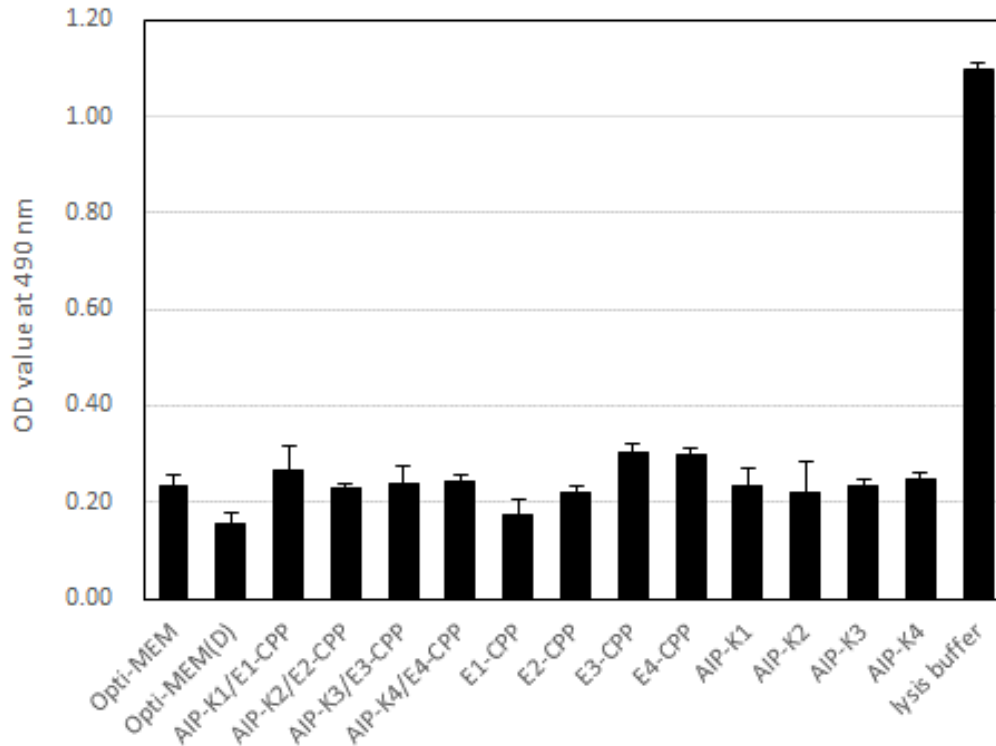

**Figure S19.** Cytotoxicity of **Kn** peptides, **En** peptides, and **Kn/En** hybrids. HeLa cells were treated with 10  $\mu$ M of the indicated **En**, **Kn** peptides, or **Kn/En** hybrids. The cytotoxicity was evaluated with measurement of lactate dehydrogenase in the culture supernatant, which is a stable cytosolic protein and released from cells into the supernatant upon cell lysis. The data represent means with standard errors from three independent experiments.
